# Supplementary material for: Linking ecology and systematics of acidobacteria: Distinct habitat preferences of the Acidobacteriia and Blastocatellia in tundra soils
Source: PubMed Central journal article supplement (PMC7077872; doi:10.1371/journal.pone.0230157), 2020-03-17
Supplement: pone.0230157.s001.pdf [file pone.0230157.s001.pdf]

**S1 Table.** Relative abundance of different acidobacterial groups (means  $\pm$  standard deviation).

| <b>Site1</b>                                      | <b>US</b>       | <b>SF</b>       | <b>MS</b>       |
|---------------------------------------------------|-----------------|-----------------|-----------------|
| Acidobacteriia;Acidobacteriales Acidobacteriaceae | 0,00 $\pm$ 0,01 | 0,11 $\pm$ 0,04 | 0,21 $\pm$ 0,02 |
| Acidobacteriia;Acidobacteriales uncultured        | 0,35 $\pm$ 0,07 | 0,29 $\pm$ 0,08 | 0,33 $\pm$ 0,06 |
| Acidobacteriia;Bryobacterales                     | 0,12 $\pm$ 0,04 | 0,36 $\pm$ 0,09 | 0,17 $\pm$ 0,06 |
| Acidobacteriia;SD2                                | 0,07 $\pm$ 0,08 | 0,18 $\pm$ 0,03 | 0,22 $\pm$ 0,07 |
| Blastocatellia (SD4)                              | 0,31 $\pm$ 0,02 | 0,04 $\pm$ 0,02 | 0,07 $\pm$ 0,04 |
| Holophagae;SD7                                    | 0,12 $\pm$ 0,01 | 0,02 $\pm$ 0,01 | 0,00 $\pm$ 0,01 |
| Other                                             | 0,02 $\pm$ 0,01 | 0,00 $\pm$ 0,00 | 0,00 $\pm$ 0,00 |
| <b>Site2</b>                                      |                 |                 |                 |
| Acidobacteriia;Acidobacteriales Acidobacteriaceae | 0,13 $\pm$ 0,05 | 0,27 $\pm$ 0,08 | 0,32 $\pm$ 0,08 |
| Acidobacteriia;Acidobacteriales uncultured        | 0,29 $\pm$ 0,07 | 0,18 $\pm$ 0,07 | 0,25 $\pm$ 0,05 |
| Acidobacteriia;Bryobacterales                     | 0,33 $\pm$ 0,06 | 0,50 $\pm$ 0,04 | 0,22 $\pm$ 0,04 |
| Acidobacteriia;SD2                                | 0,04 $\pm$ 0,02 | 0,02 $\pm$ 0,01 | 0,20 $\pm$ 0,11 |
| Blastocatellia (SD4)                              | 0,14 $\pm$ 0,05 | 0,03 $\pm$ 0,02 | 0,00 $\pm$ 0,00 |
| Holophagae;SD7                                    | 0,07 $\pm$ 0,03 | 0,00 $\pm$ 0,00 | 0,00 $\pm$ 0,00 |
| Other                                             | 0,02 $\pm$ 0,03 | 0,00 $\pm$ 0,00 | 0,01 $\pm$ 0,01 |
