# Supplementary material for: Linking ecology and systematics of acidobacteria: Distinct habitat preferences of the Acidobacteriia and Blastocatellia in tundra soils
Source: PubMed Central journal article supplement (PMC7077872; doi:10.1371/journal.pone.0230157), 2020-03-17
Supplement: pone.0230157.s002.pdf [file pone.0230157.s002.pdf]

**S2 Table.** Statistical values calculated by multiple t-test comparisons for acidobacterial groups from Site 1 and 2. Statistically significant values (P-value confidence level<0.05) are indicated by bold.

| Taxa                                                 | Site1              |                    |                    | Site2           |                    |                    |
|------------------------------------------------------|--------------------|--------------------|--------------------|-----------------|--------------------|--------------------|
|                                                      | US/SF              | SF/MS              | US/MS              | US/SF           | SF/MS              | US/MS              |
|                                                      | P-value            | P-value            | P-value            | P-value         | P-value            | P-value            |
| Acidobacteriia;Acidobacteriales<br>Acidobacteriaceae | <b>0,00659</b>     | 0,121839           | <b>&lt; 0,0001</b> | <b>0,000139</b> | 0,284717           | <b>&lt; 0,0001</b> |
| Acidobacteriia;Acidobacteriales<br>uncultured        | 0,153357           | 0,121839           | > 0,9999           | <b>0,005011</b> | 0,110811           | 0,308411           |
| Acidobacteriia;Bryobacterales                        | <b>&lt; 0,0001</b> | <b>&lt; 0,0001</b> | 0,409868           | <b>0,000139</b> | <b>&lt; 0,0001</b> | 0,012865           |
| Acidobacteriia;SD2                                   | <b>0,00659</b>     | 0,431744           | <b>0,000257</b>    | 0,561333        | <b>&lt; 0,0001</b> | <b>0,00013</b>     |
| Blastocatellia (SD4)                                 | <b>&lt; 0,0001</b> | 0,431744           | <b>&lt; 0,0001</b> | <b>0,000903</b> | 0,591296           | <b>0,00068</b>     |
| Holophagae;SD7                                       | 0,036116           | > 0,9999           | 0,01813            | 0,085067        | > 0,9999           | 0,128738           |
| Other                                                | > 0,9999           | > 0,9999           | > 0,9999           | 0,561333        | > 0,9999           | 0,609305           |
