# Supplementary material for: Linking ecology and systematics of acidobacteria: Distinct habitat preferences of the Acidobacteriia and Blastocatellia in tundra soils
Source: PubMed Central journal article supplement (PMC7077872; doi:10.1371/journal.pone.0230157), 2020-03-17

**S1 Figure.** Venn diagrams showing the number of shared and unique OTUs in Sites 1 and 2, and in three types of successional stages examined in this study.

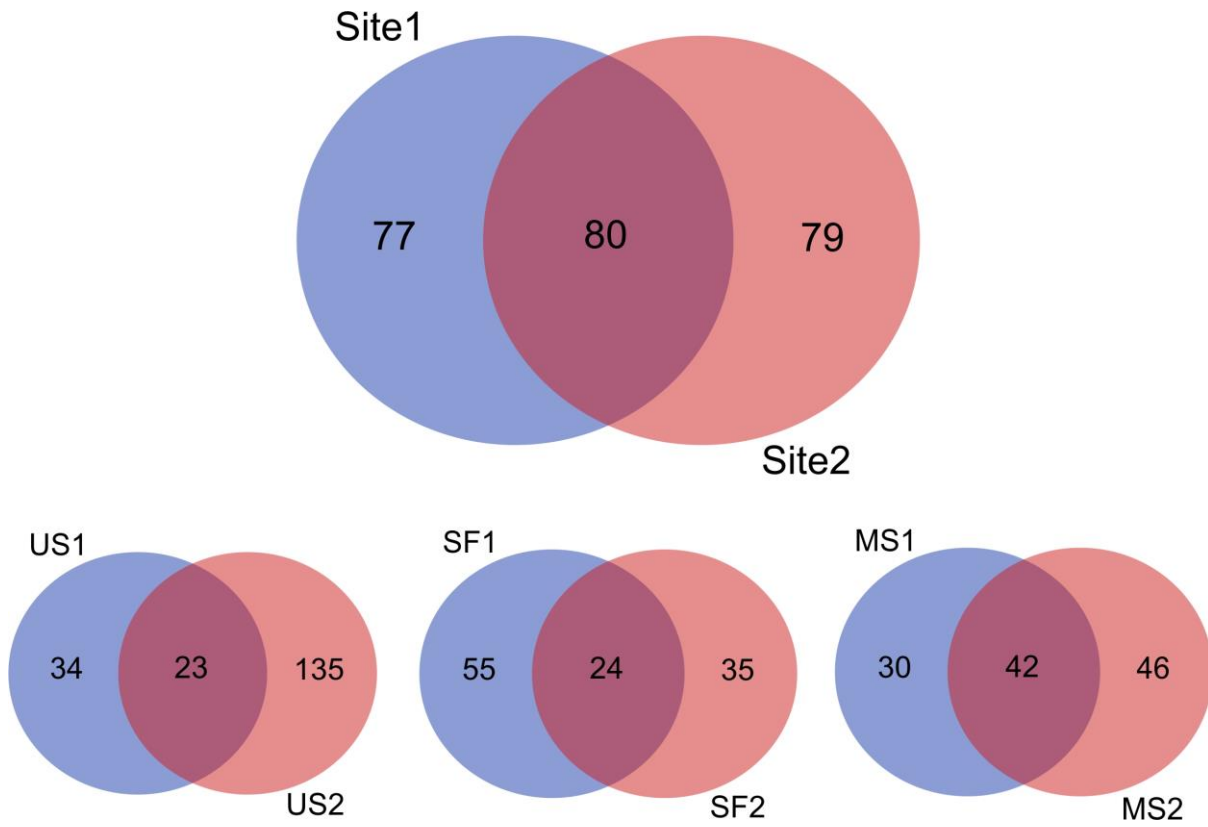

Supplement: pone.0230157.s003.pdf [file pone.0230157.s003.pdf]
